# Supplementary figures and images for: Language Barriers and Access to Psychiatric Care: A Systematic Review
Source: Atypon-hosted journal article supplement (doi:10.1176/appi.ps.201400351), 2015-05-01

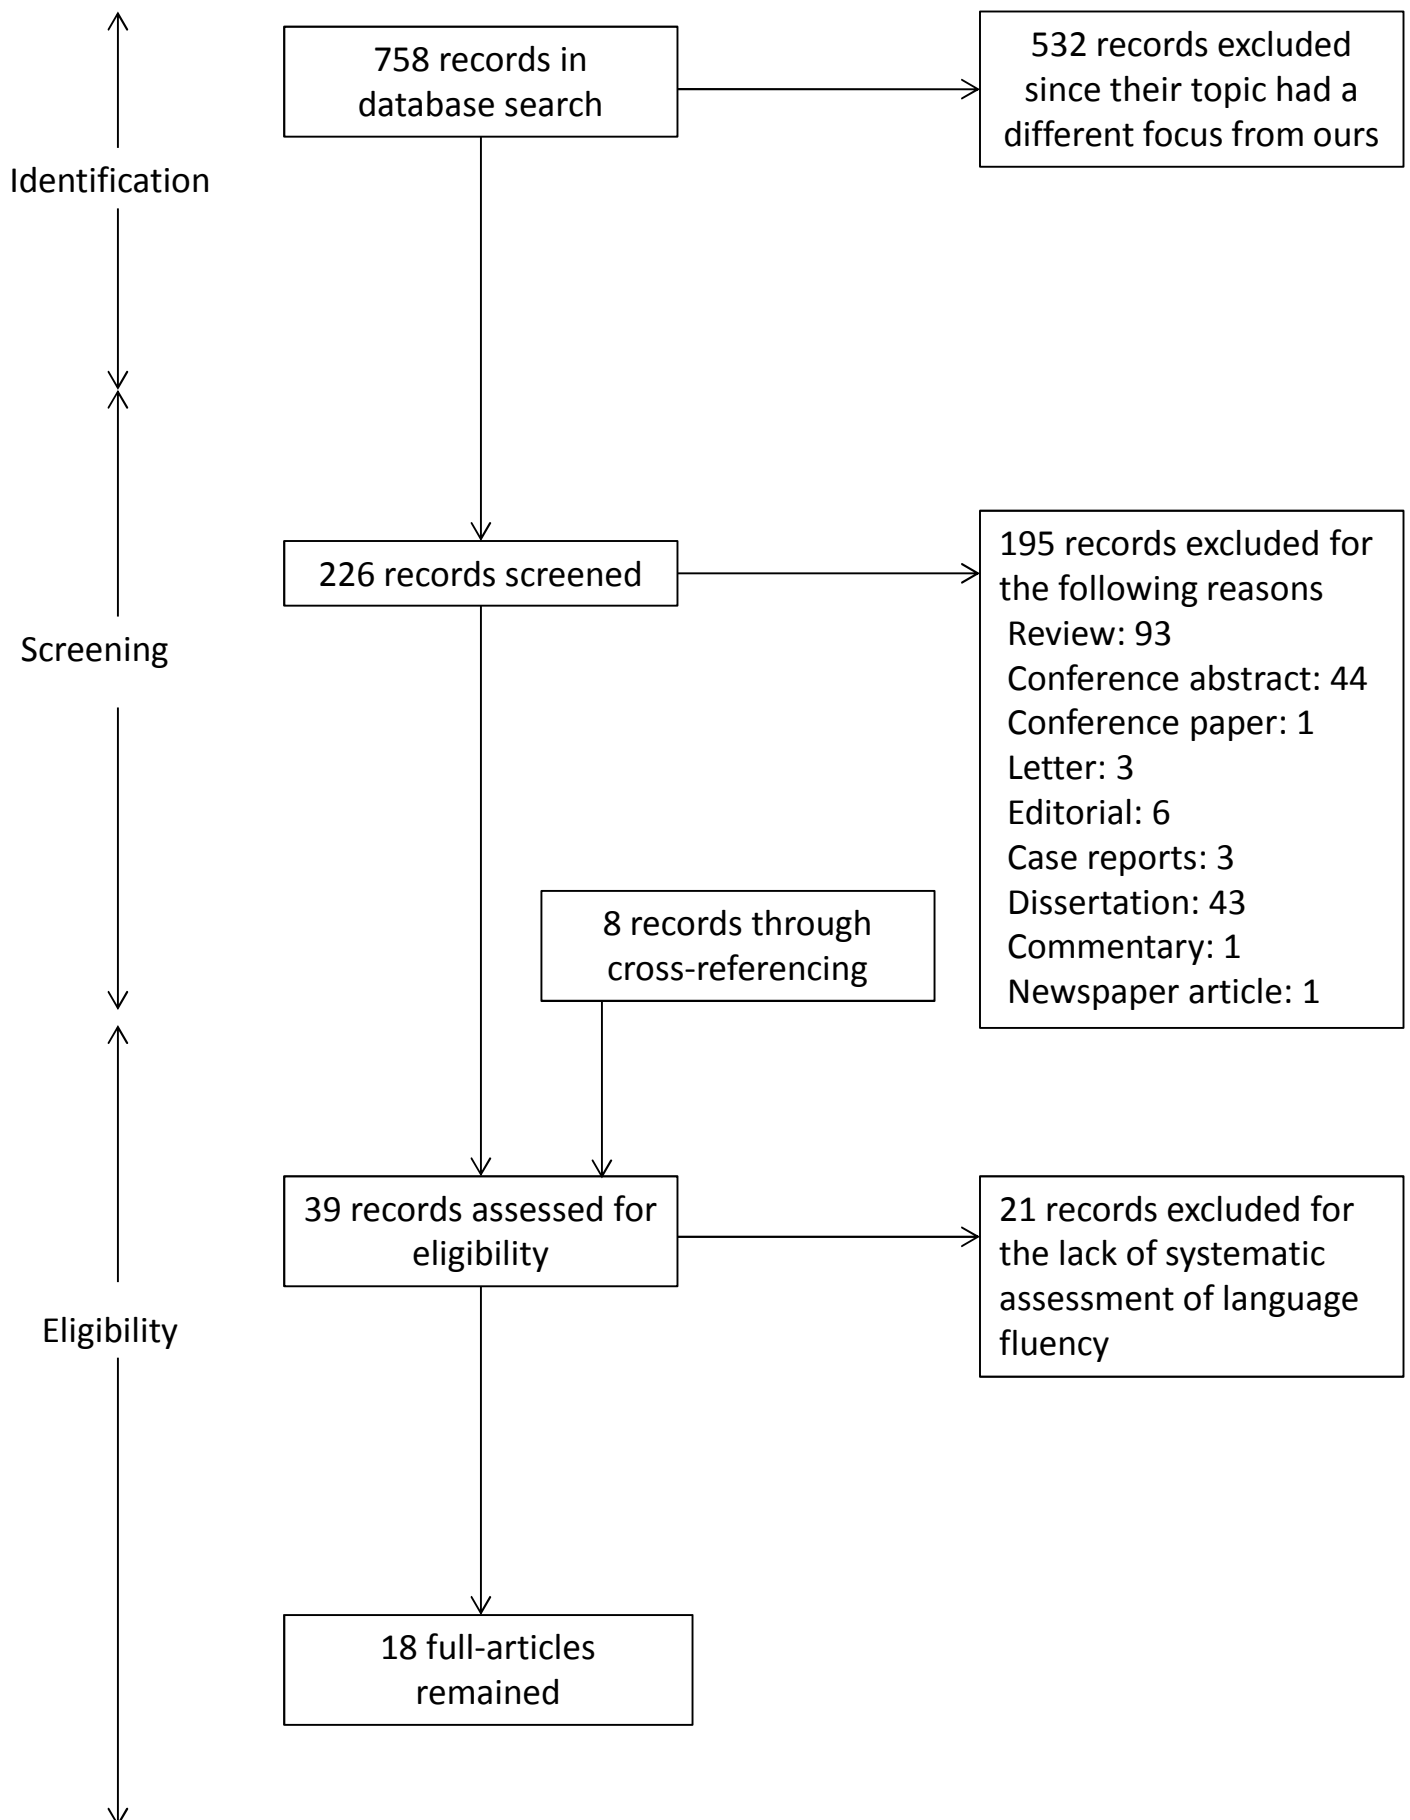

Supplement: appi.ps.201400351.ds001.pdf [file appi.ps.201400351.ds001.pdf]
